# Supplementary material for: LPS aggravates lung inflammation induced by RSV by promoting the ERK-MMP-12 signaling pathway in mice
Source: Springer Nature journal article supplement (doi:10.1186/s12931-020-01453-6), 2020-07-21

### Supplementary data 3

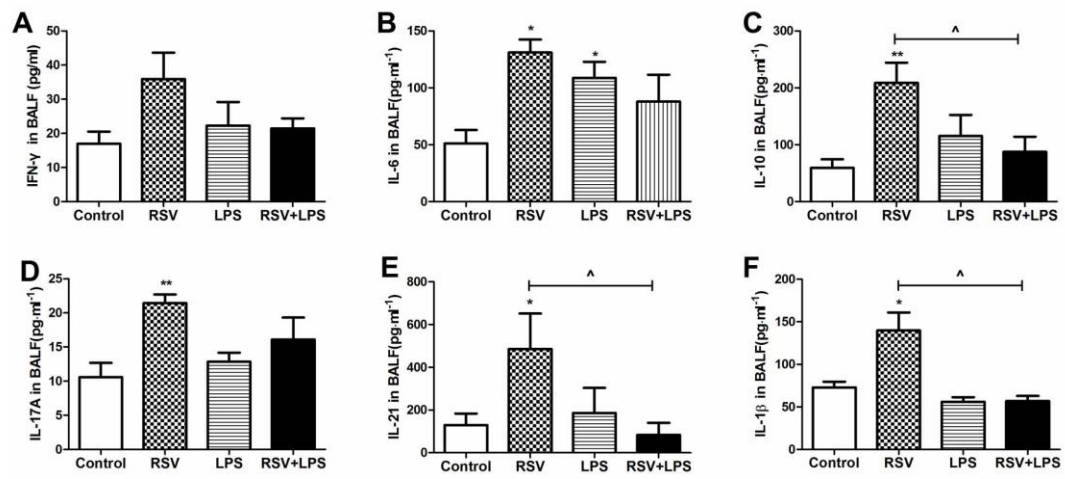

Supplement: MOESM3 [file 18202774]
